# Supplementary material
Source: ML conference proceedings conference paper supplement (https://openaccess.thecvf.com/content/CVPR2021/html/Zhong_Towards_Rolling_Shutter_CVPR_2021_paper.html)
Supplement: Supplementary file 1 [file Zhong_Towards_Rolling_Shutter_CVPR_2021_supplemental.zip]

# Towards Rolling Shutter Correction and Deblurring in Dynamic Scenes (Supplementary Materials)

Zhihang Zhong<sup>1,2</sup>    Yinqiang Zheng<sup>1</sup>    Imari Sato<sup>2,1</sup>

<sup>1</sup>The University of Tokyo, Japan    <sup>2</sup>National Institute of Informatics, Japan

zhong@is.s.u-tokyo.ac.jp    yqzheng@ai.u-tokyo.ac.jp    imarik@nii.ac.jp

## 1. Video Results

Video demos are generated to show results on the proposed rolling shutter correction and deblurring (RSCD) dataset, BS-RSCD, and rolling shutter correction (RSC) dataset, Fastec-RS [1]. The former part of [video\\_results.mp4](#) includes input, ground truth, the predicted results of state-of-the-art (SoTA) RSCD method [2] and the proposed JCD; while the latter part includes input, ground truth, the predicted results of SoTA RSC method [1] and the proposed JCD.

## 2. Inference Time Comparison

|                         | Resolution $640 \times 480$ |                   |
|-------------------------|-----------------------------|-------------------|
|                         | time / frame                | hardware          |
| RS-BMD [3]              | 400.48 s                    | i9-9900K (CPU)    |
| Mohan <i>et al.</i> [2] | 329.18 s                    | i9-9900K (CPU)    |
| Ours                    | 0.54 s                      | RTX 2080 Ti (GPU) |

Table 1: Inference time comparison. The inference time of RS-BMD [3] is estimated by the publicly available source code. The inference time of Mohan *et al.* [2] is estimate by the source code provided by the author.

We present the inference time comparison for a single frame with size of  $640 \times 480$  in Table 1. Since learning-based methods can take advantage of the parallel computational power of graphics cards, our method achieves three orders of magnitude faster than the SoTA RSCD methods, RS-BMD [3] and Mohan *et al.* [2].

## References

- [1] Peidong Liu, Zhaopeng Cui, Viktor Larsson, and Marc Pollefeys. Deep shutter unrolling network. In *Proceedings of the IEEE/CVF Conference on Computer Vision and Pattern Recognition*, pages 5941–5949, 2020. 1
- [2] Mahesh MR Mohan, AN Rajagopalan, and Gunasekaran Seetharaman. Going unconstrained with rolling shutter deblurring. In *Proceedings of the IEEE International Conference on Computer Vision*, pages 4010–4018, 2017. 1
- [3] Shuochen Su and Wolfgang Heidrich. Rolling shutter motion deblurring. In *Proceedings of the IEEE Conference on Computer Vision and Pattern Recognition*, pages 1529–1537, 2015. 1
