# Supplementary material
Source: ML conference proceedings conference paper supplement (https://openaccess.thecvf.com/content/CVPR2021/html/Zhong_Towards_Rolling_Shutter_CVPR_2021_paper.html)
Supplement: Supplementary file 2 [file Zhong_Towards_Rolling_Shutter_CVPR_2021_supplemental.zip]

Archive with 2 entries (2 files):
- 07674-supp.mp4
- 07674-supp.pdf
